# Supplementary material
Source: MDPI journal article supplement (https://www.mdpi.com/2073-4352/12/10/1339)

The  $^{11}\text{B}$  NMR spectrum of  $\text{NaCB}_{11}\text{H}_{12}$  in  $d_6$ -DMSO

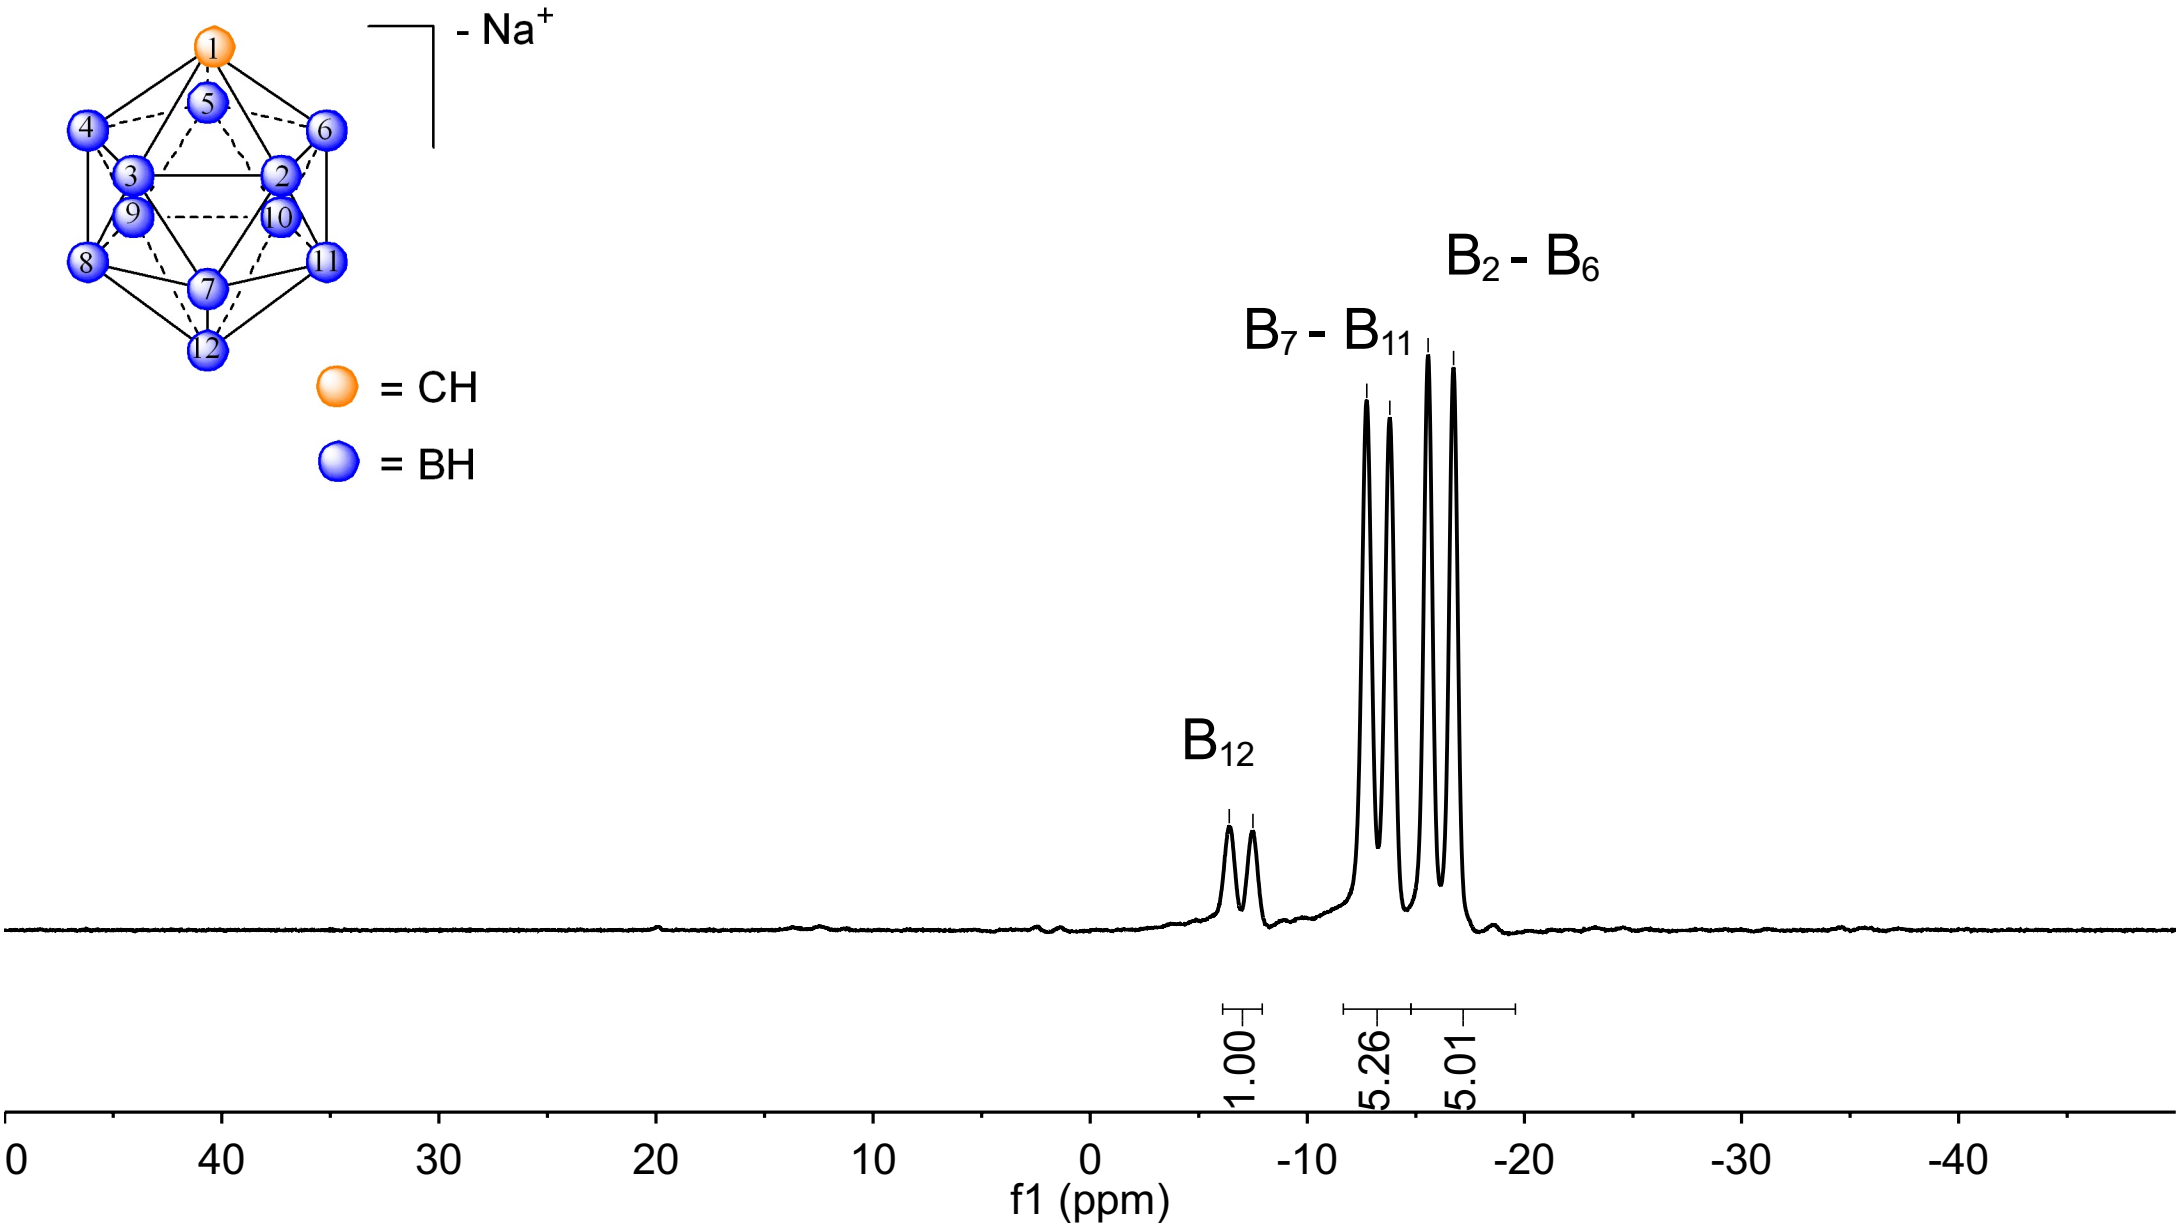

The  $^{11}\text{B}\{^1\text{H}\}$  NMR spectrum of  $\text{NaCB}_{11}\text{H}_{12}$  in  $d_6$ -DMSO

--7.01  
--13.27  
--16.16

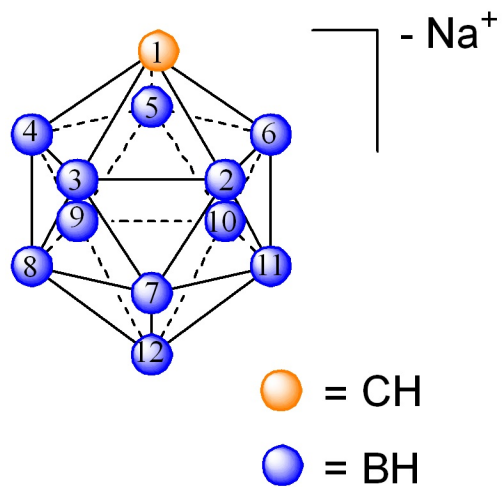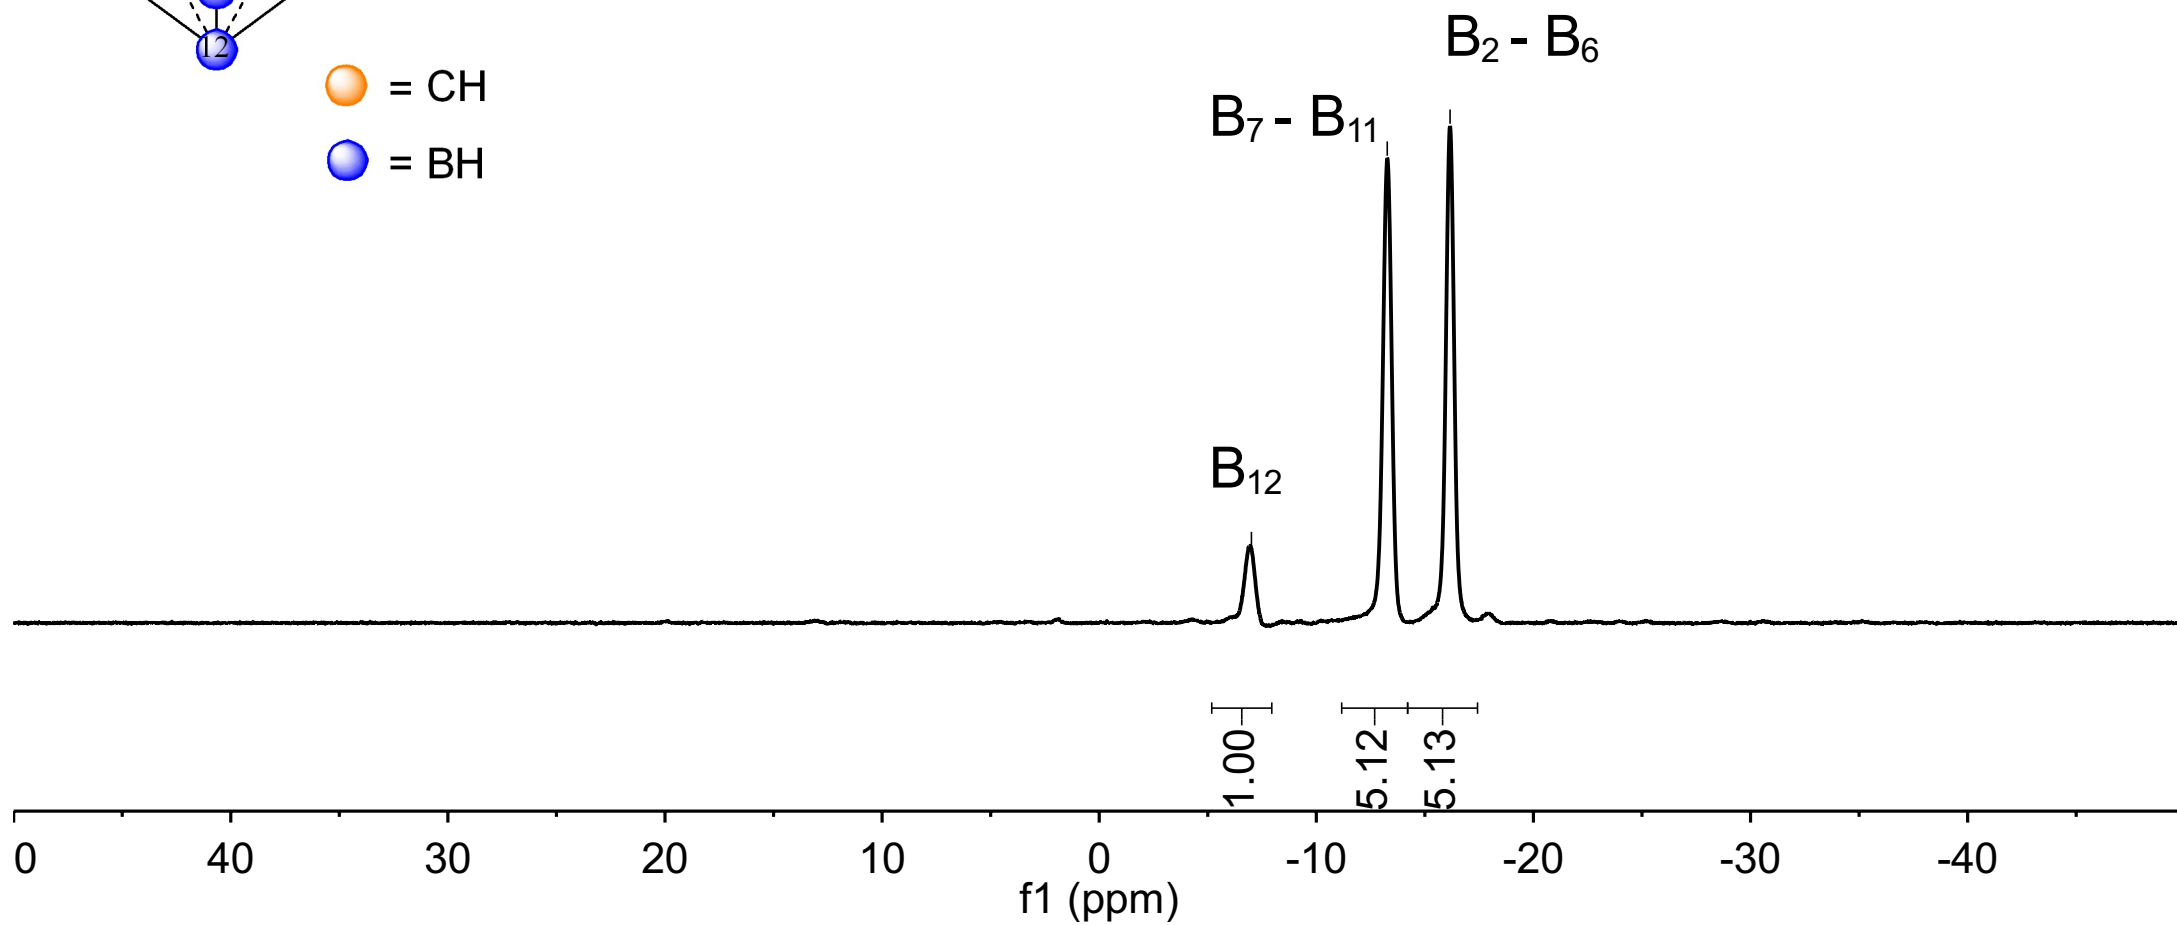

The  $^1\text{H}$  NMR spectrum of  $\text{NaCB}_{11}\text{H}_{12}$  in  $d_6$ -DMSO

3.30  
2.49  
2.36

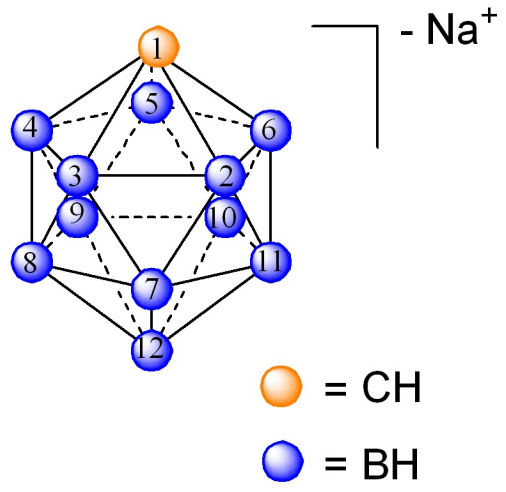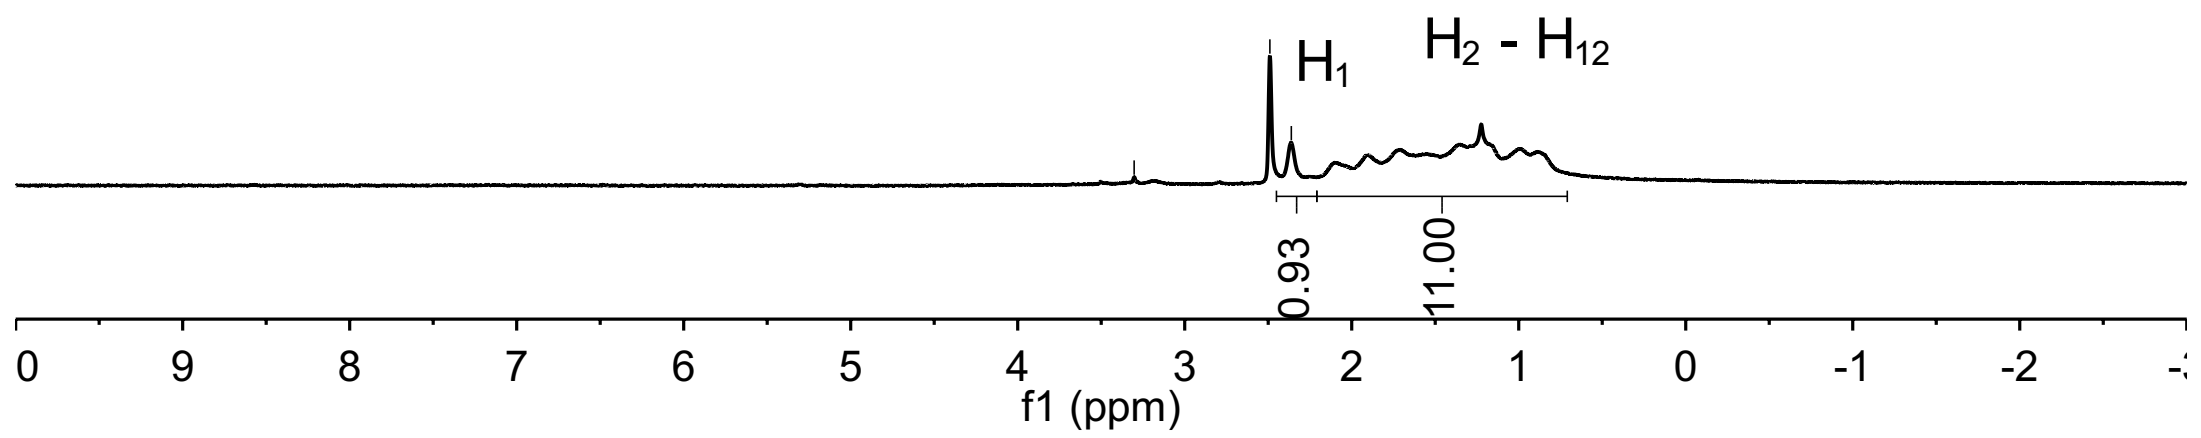

The  $^1\text{H}\{^{11}\text{B}\}$  NMR spectrum of  $\text{NaCB}_{11}\text{H}_{12}$  in  $d_6$ -DMSO

— 3.29

~ 2.49

~ 2.36

~ 1.55

~ 1.40

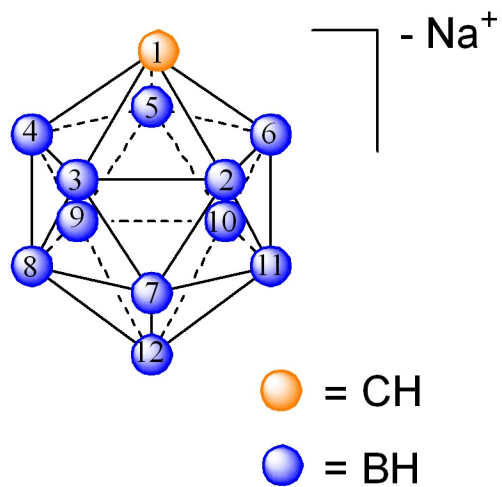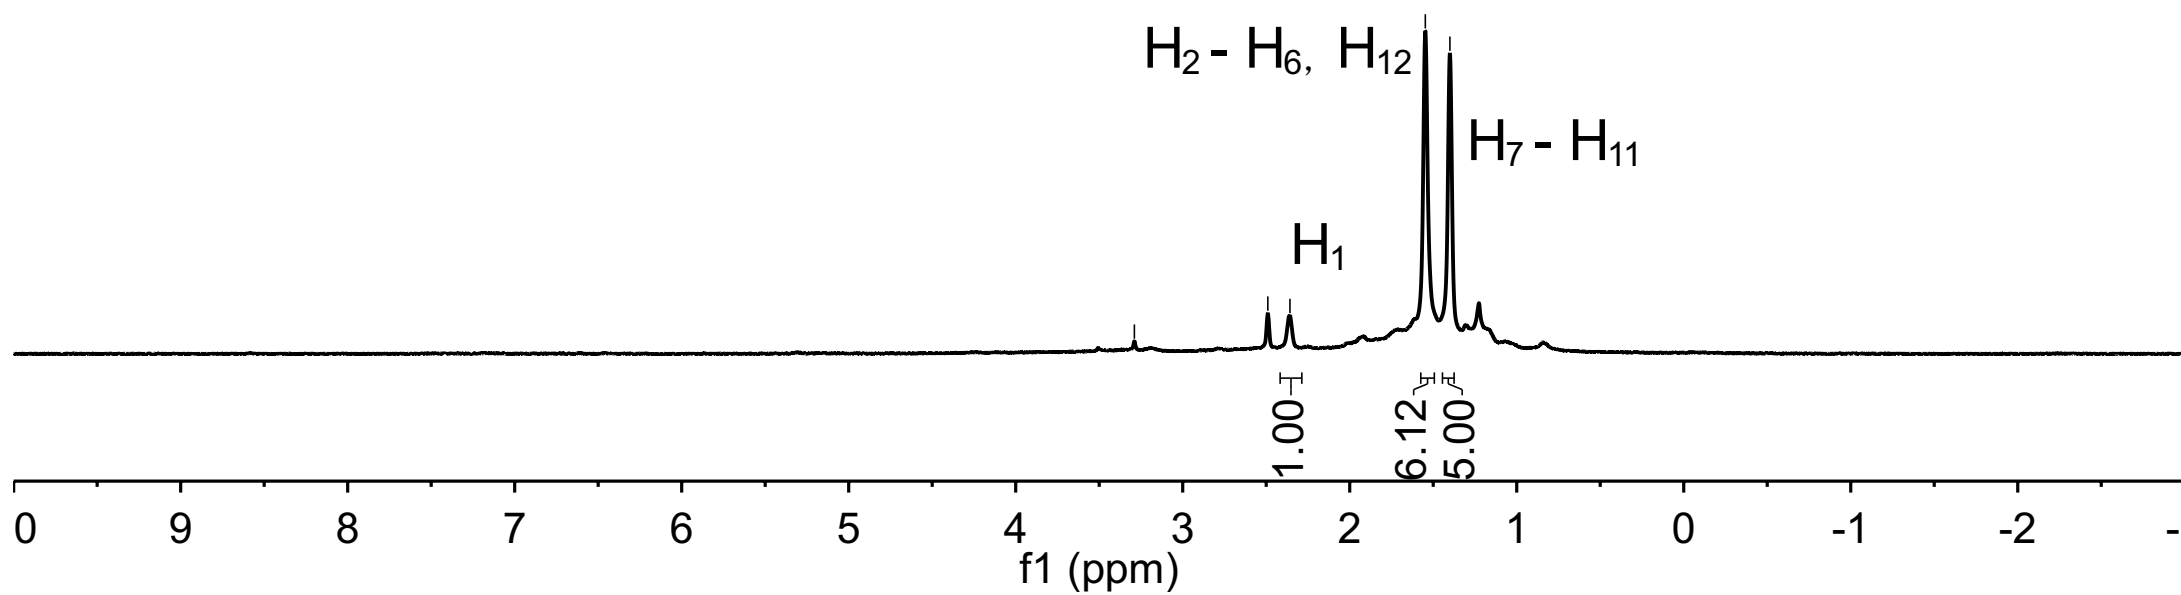

The  $^{13}\text{C}\{^1\text{H}\}$  NMR spectrum of  $\text{NaCB}_{11}\text{H}_{12}$  in  $d_6$ -DMSO

50.69  
40.15  
39.94  
39.73  
39.52  
39.31  
39.10  
38.89

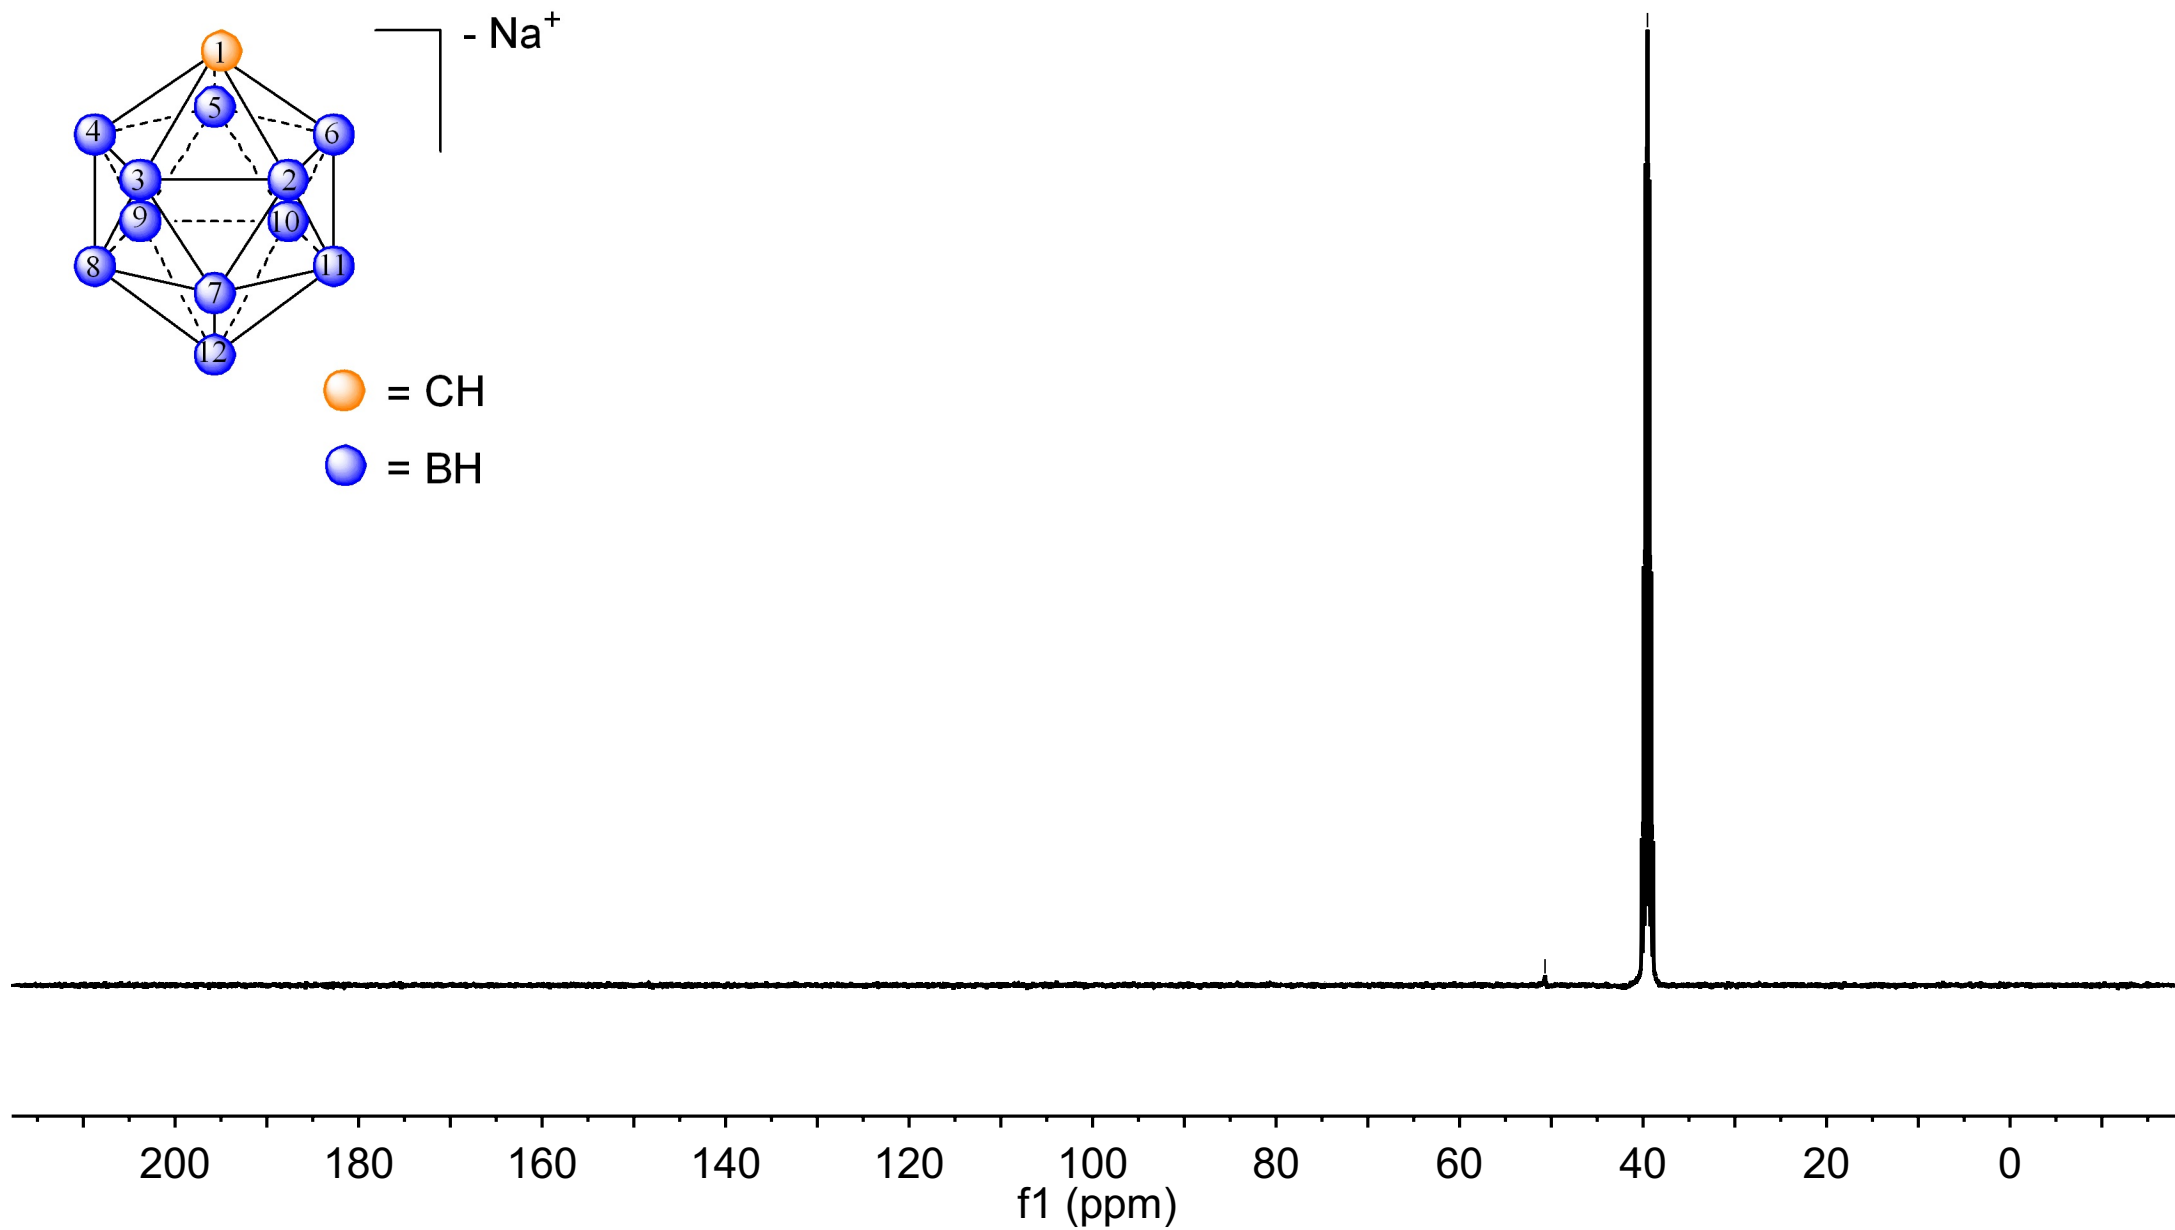

The  $^{11}\text{B}$  NMR spectrum of  $\text{KCB}_{11}\text{H}_{12}$  in  $d_6$ -DMSO

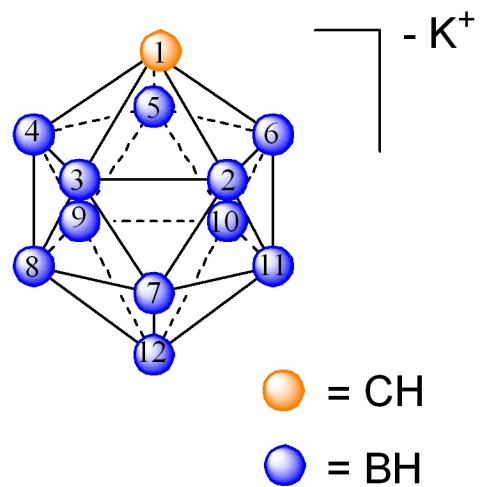

$\sim -6.41$   
 $\sim -7.50$   
 $\sim -12.74$   
 $\sim -13.80$   
 $\sim -15.56$   
 $\sim -16.74$

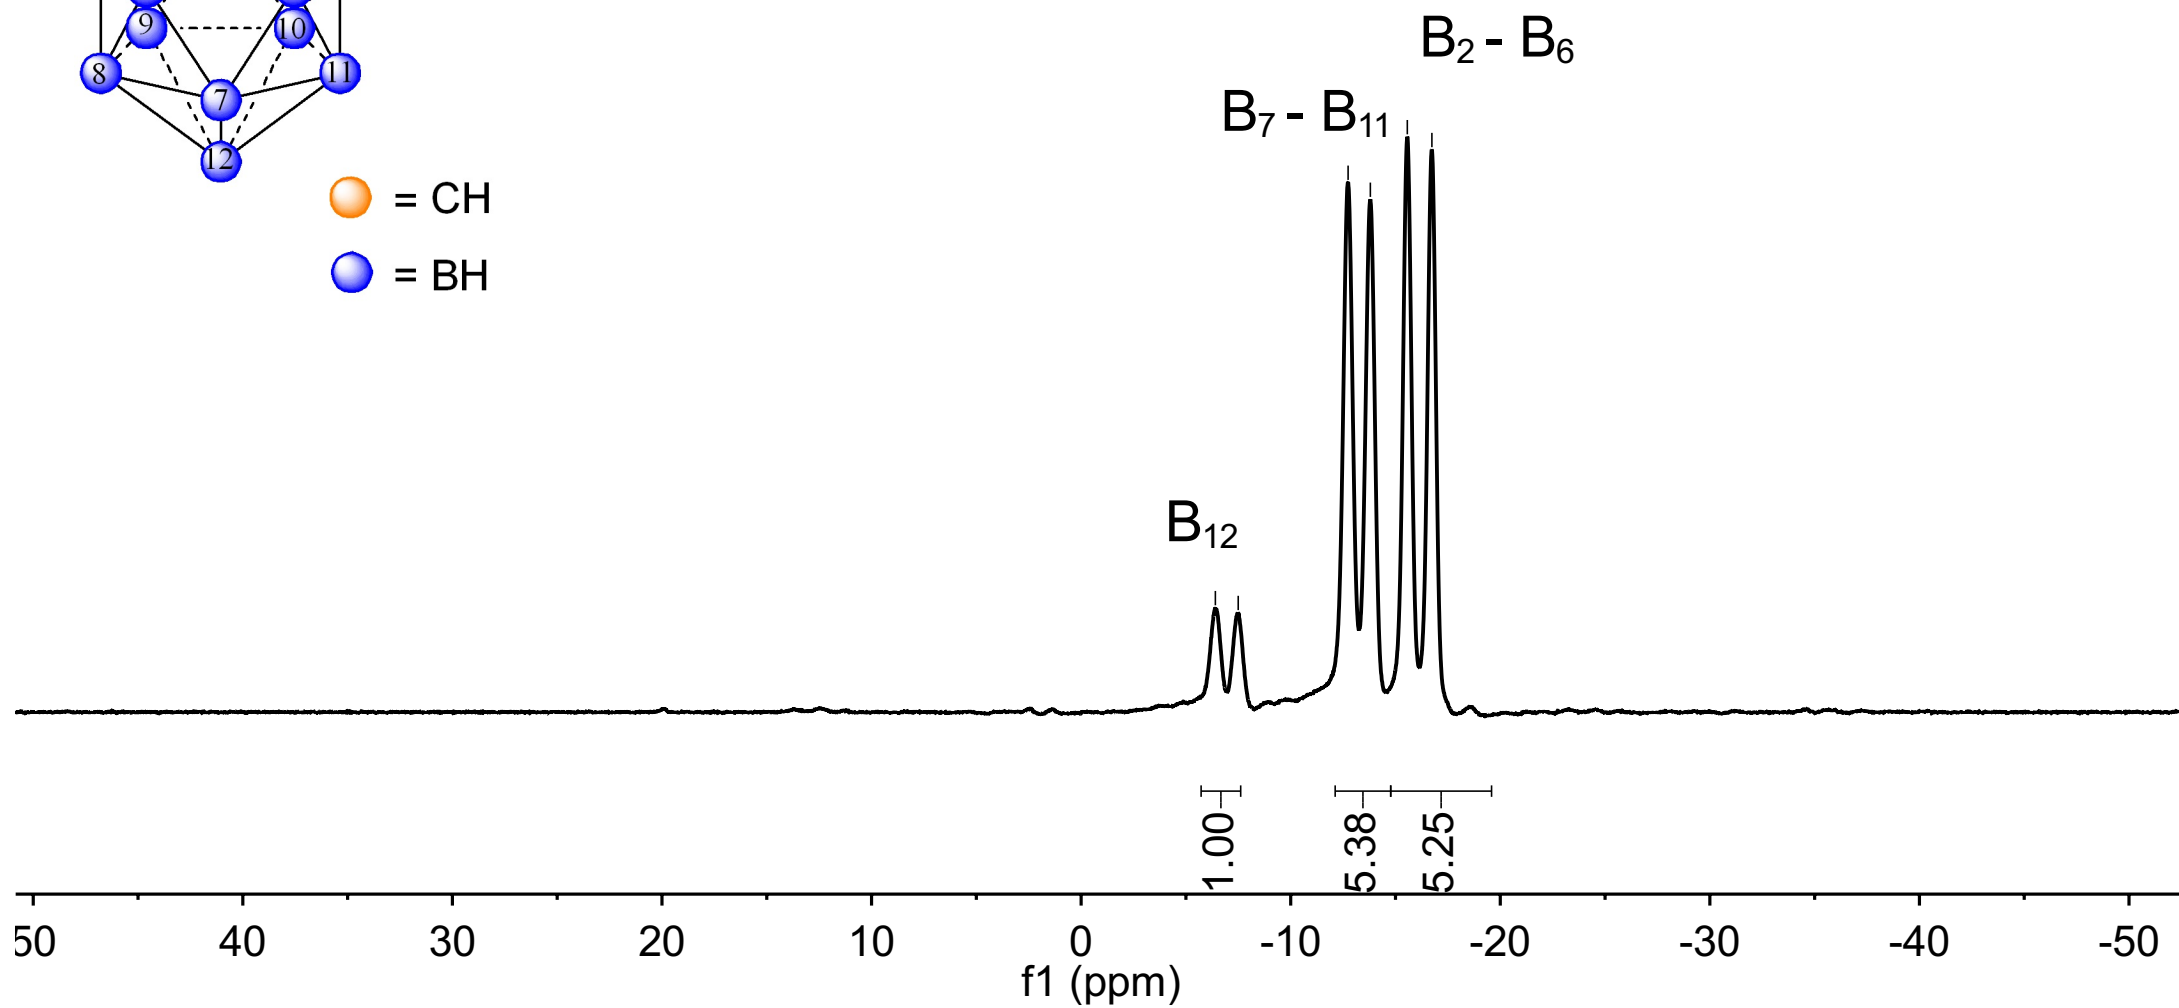

The  $^{11}\text{B}\{^1\text{H}\}$  NMR spectrum of  $\text{KCB}_{11}\text{H}_{12}$  in  $d_6$ -DMSO

--7.01  
--13.27  
--16.16

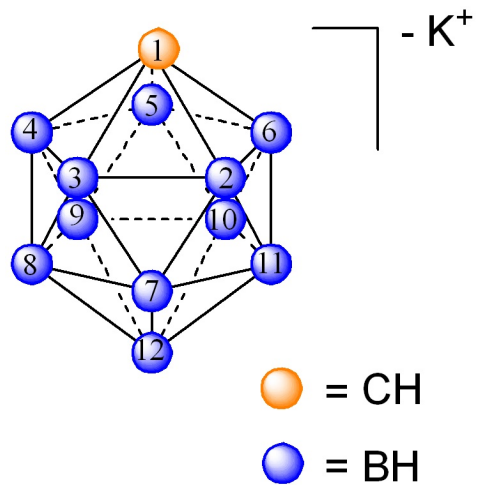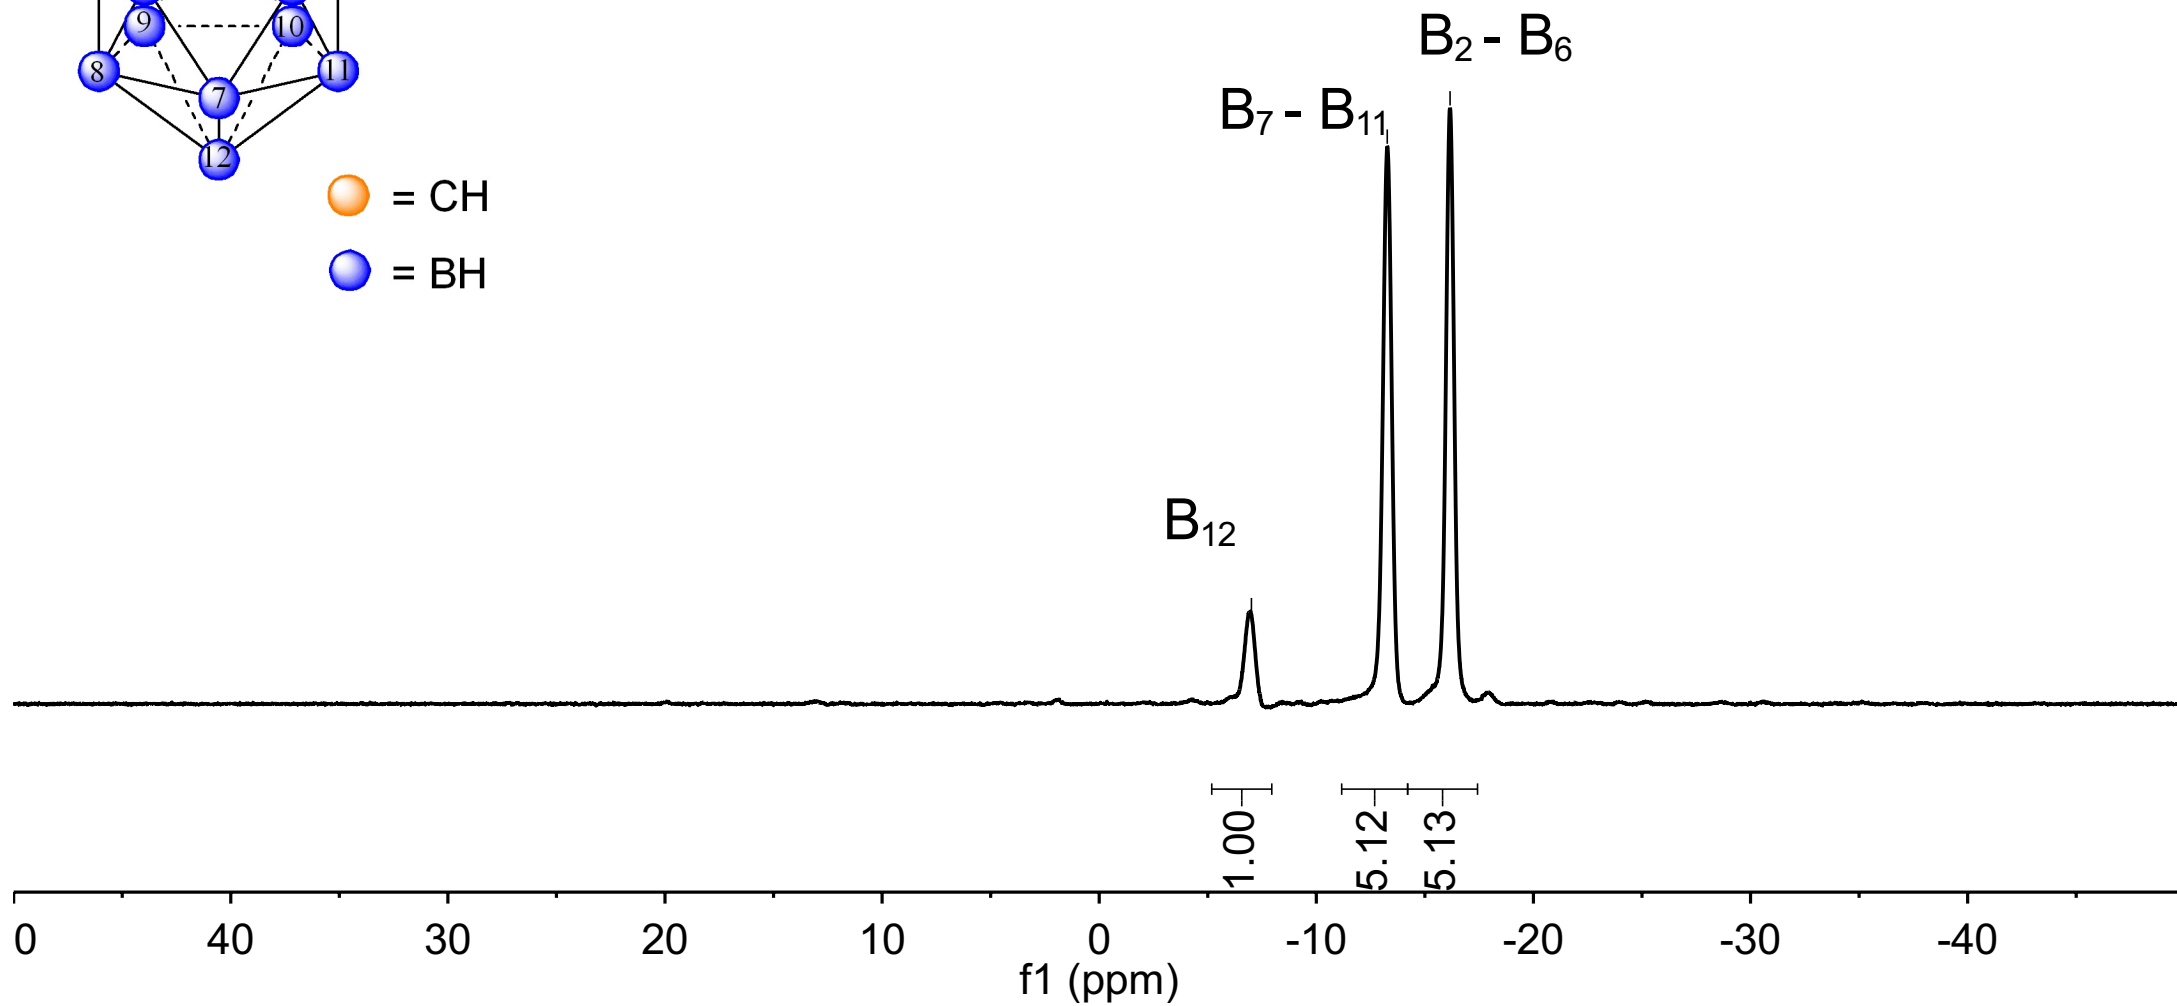

The  $^1\text{H}$  NMR spectrum of  $\text{KCB}_{11}\text{H}_{12}$  in  $d_6$ -DMSO

3.30

2.49

2.36

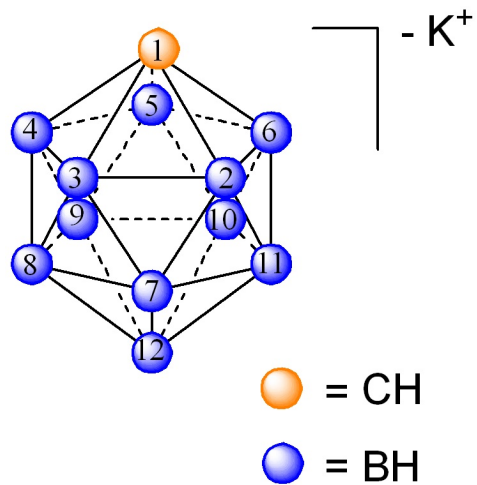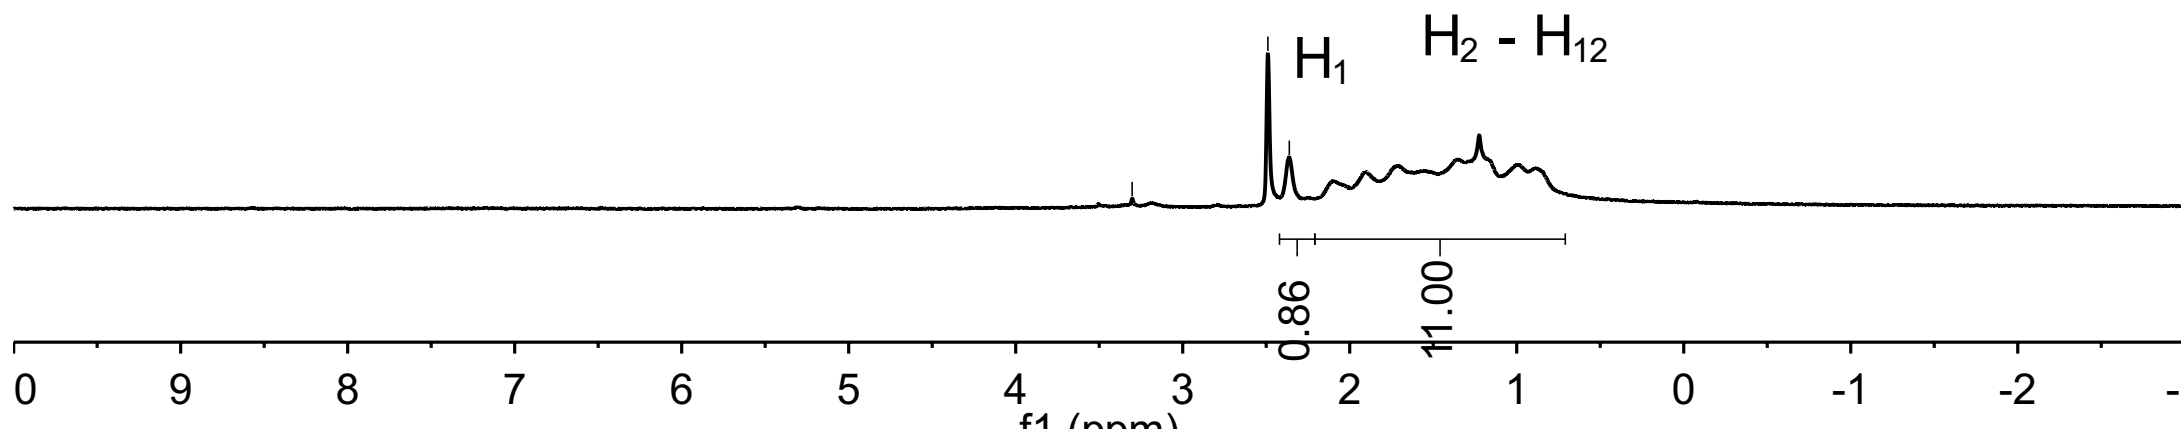



The  $^1\text{H}\{^{11}\text{B}\}$  NMR spectrum of  $\text{KCB}_{11}\text{H}_{12}$  in  $d_6$ -DMSO

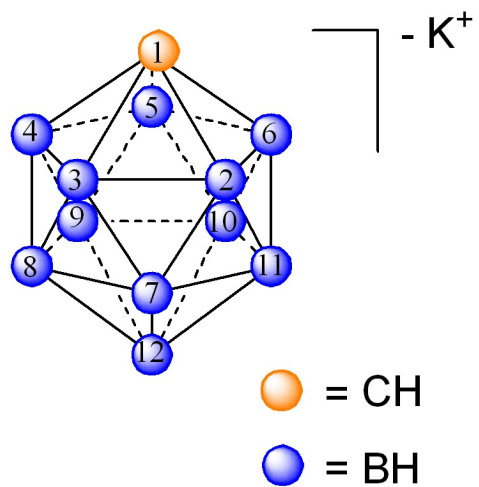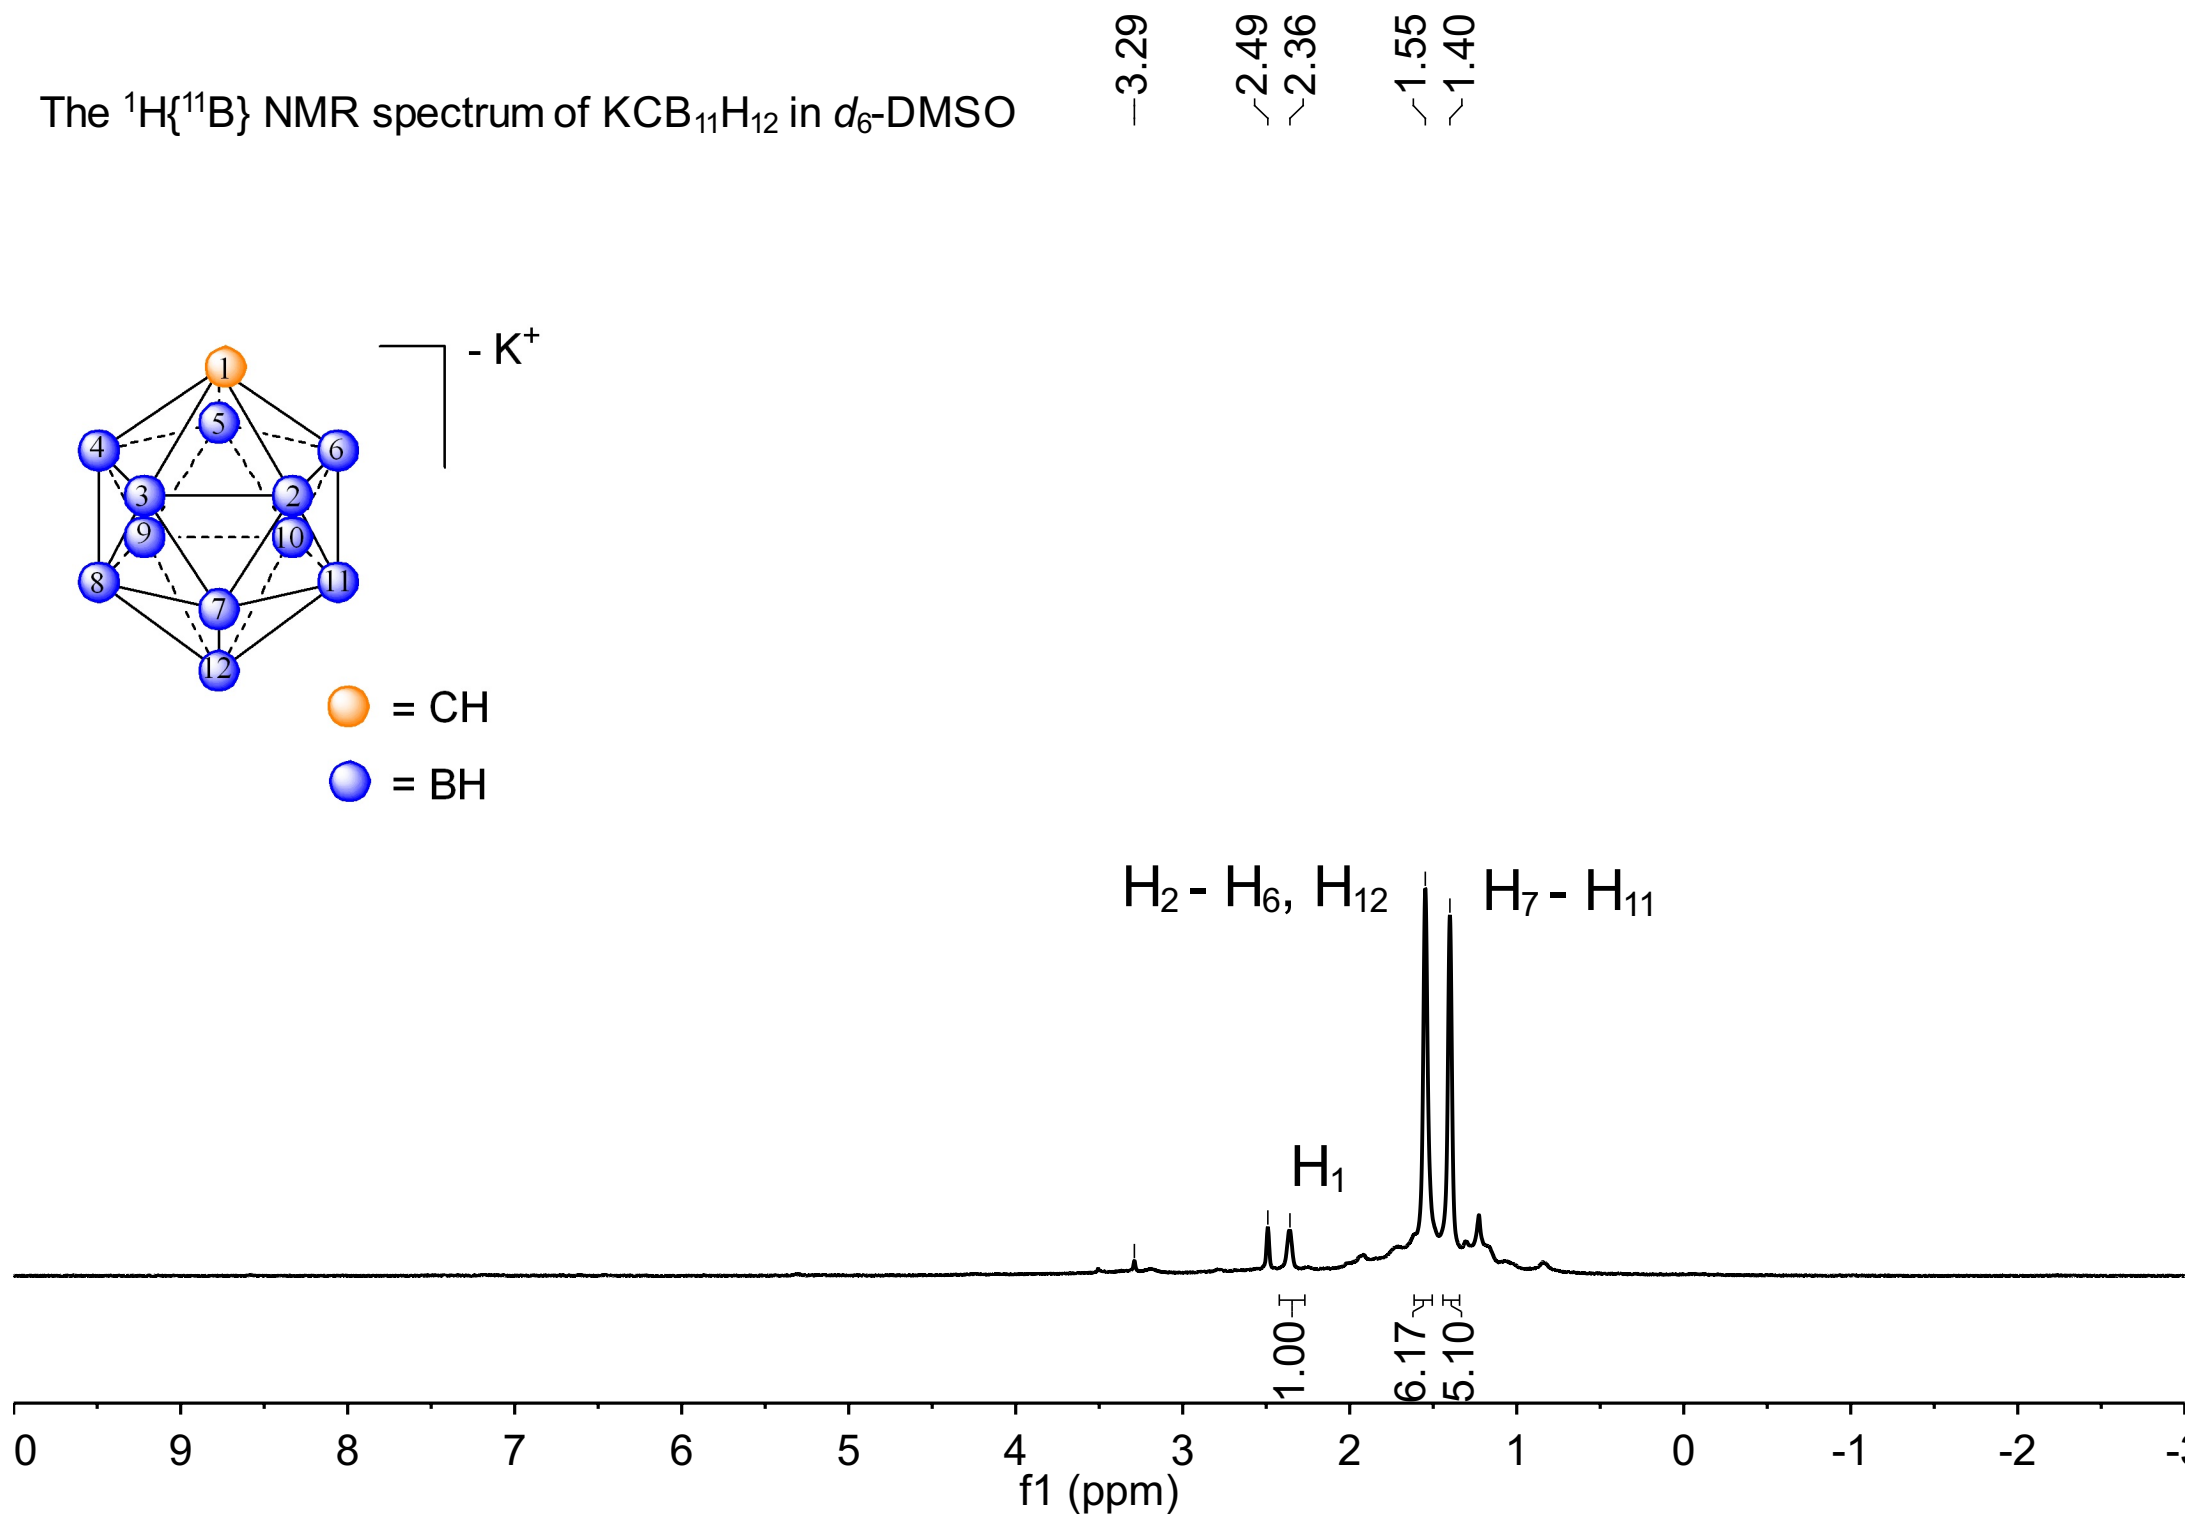

The  $^{13}\text{C}\{^1\text{H}\}$  NMR spectrum of  $\text{KCB}_{11}\text{H}_{12}$  in  $d_6$ -DMSO

50.69  
40.15  
39.94  
39.73  
39.52  
39.31  
39.10  
38.89

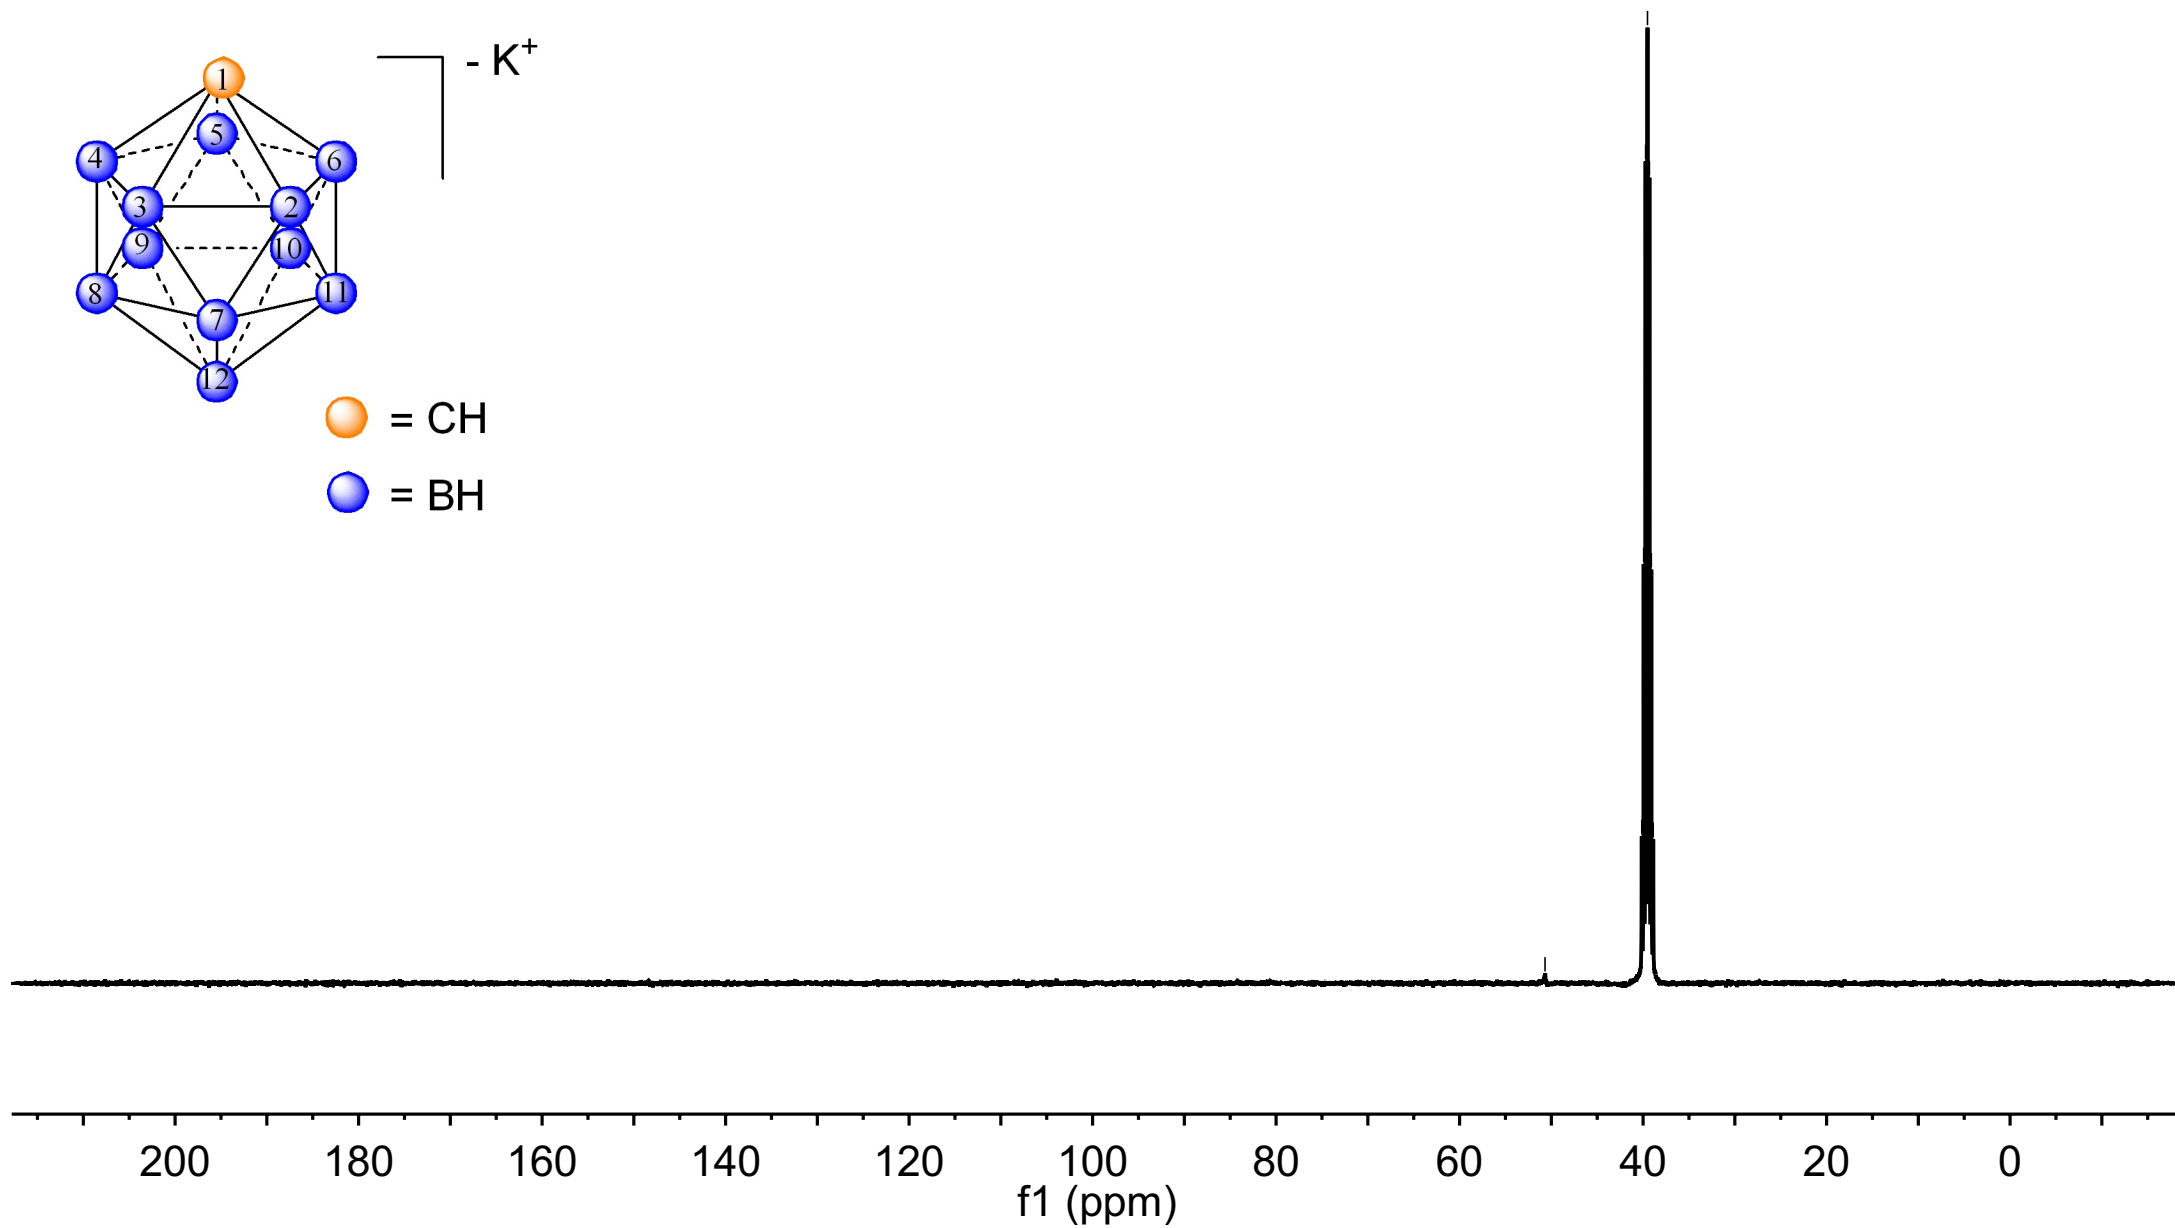

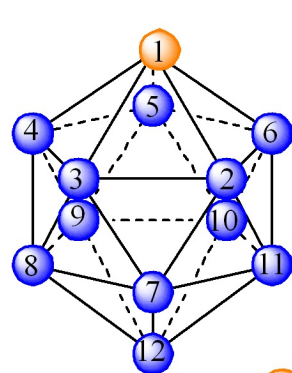

● = CH

● = BH

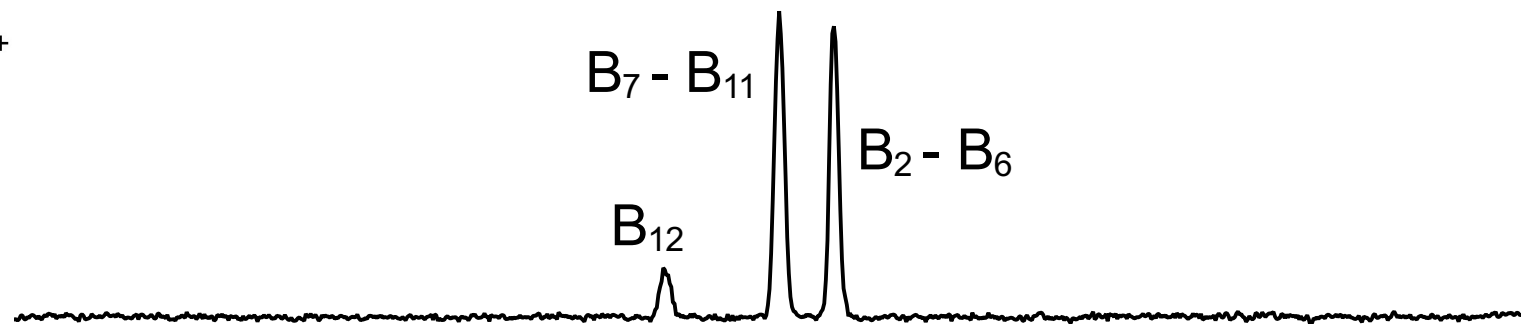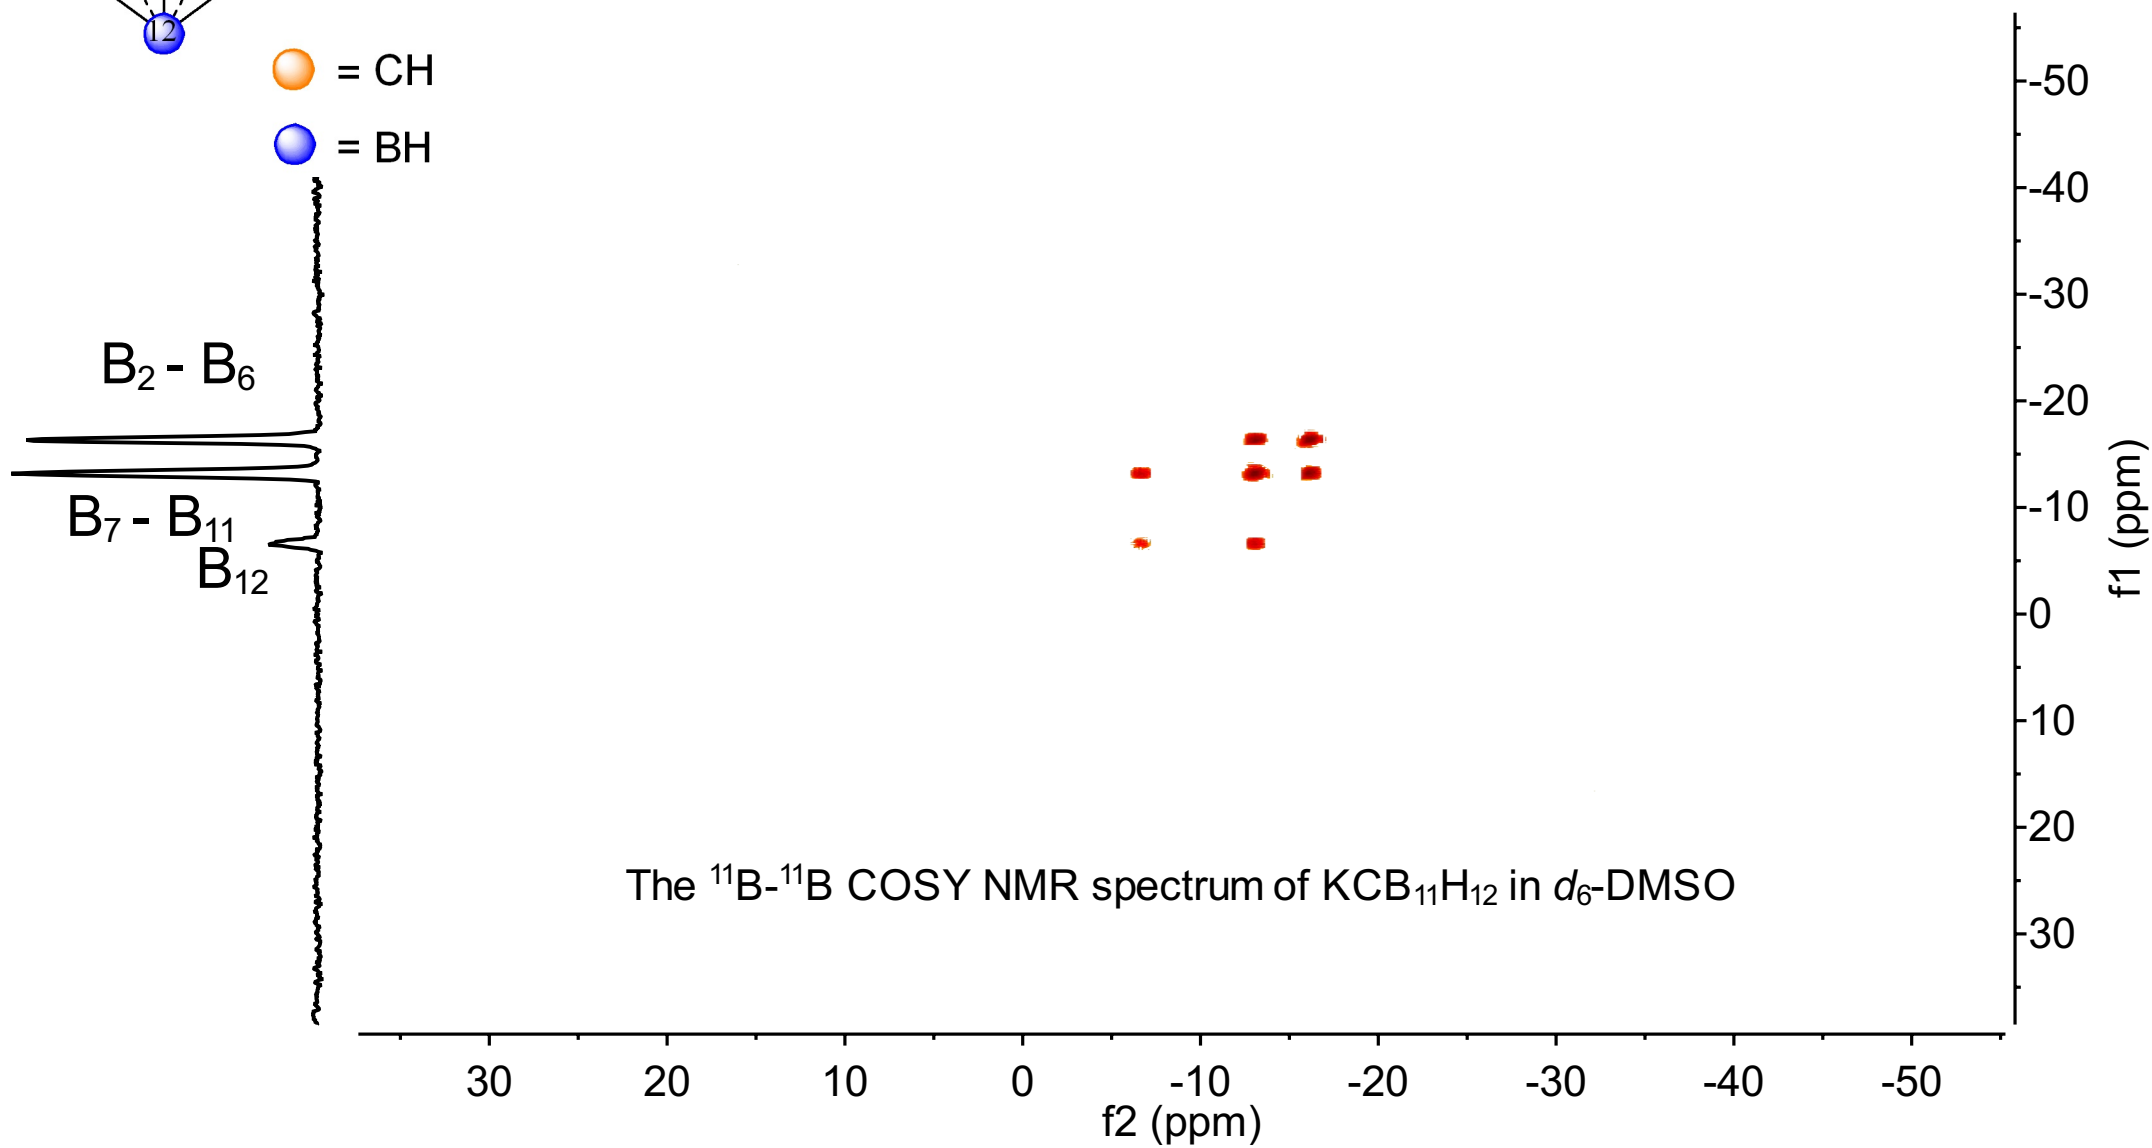

Supplement: s1 [file s1]
